# Supplementary material for: Unexpected conformational variations of the human centromeric chromatin complex
Source: PubMed Central journal article supplement (PMC5828391; doi:10.1101/gad.307736.117), 2018-01-01

Supplementary figure 1

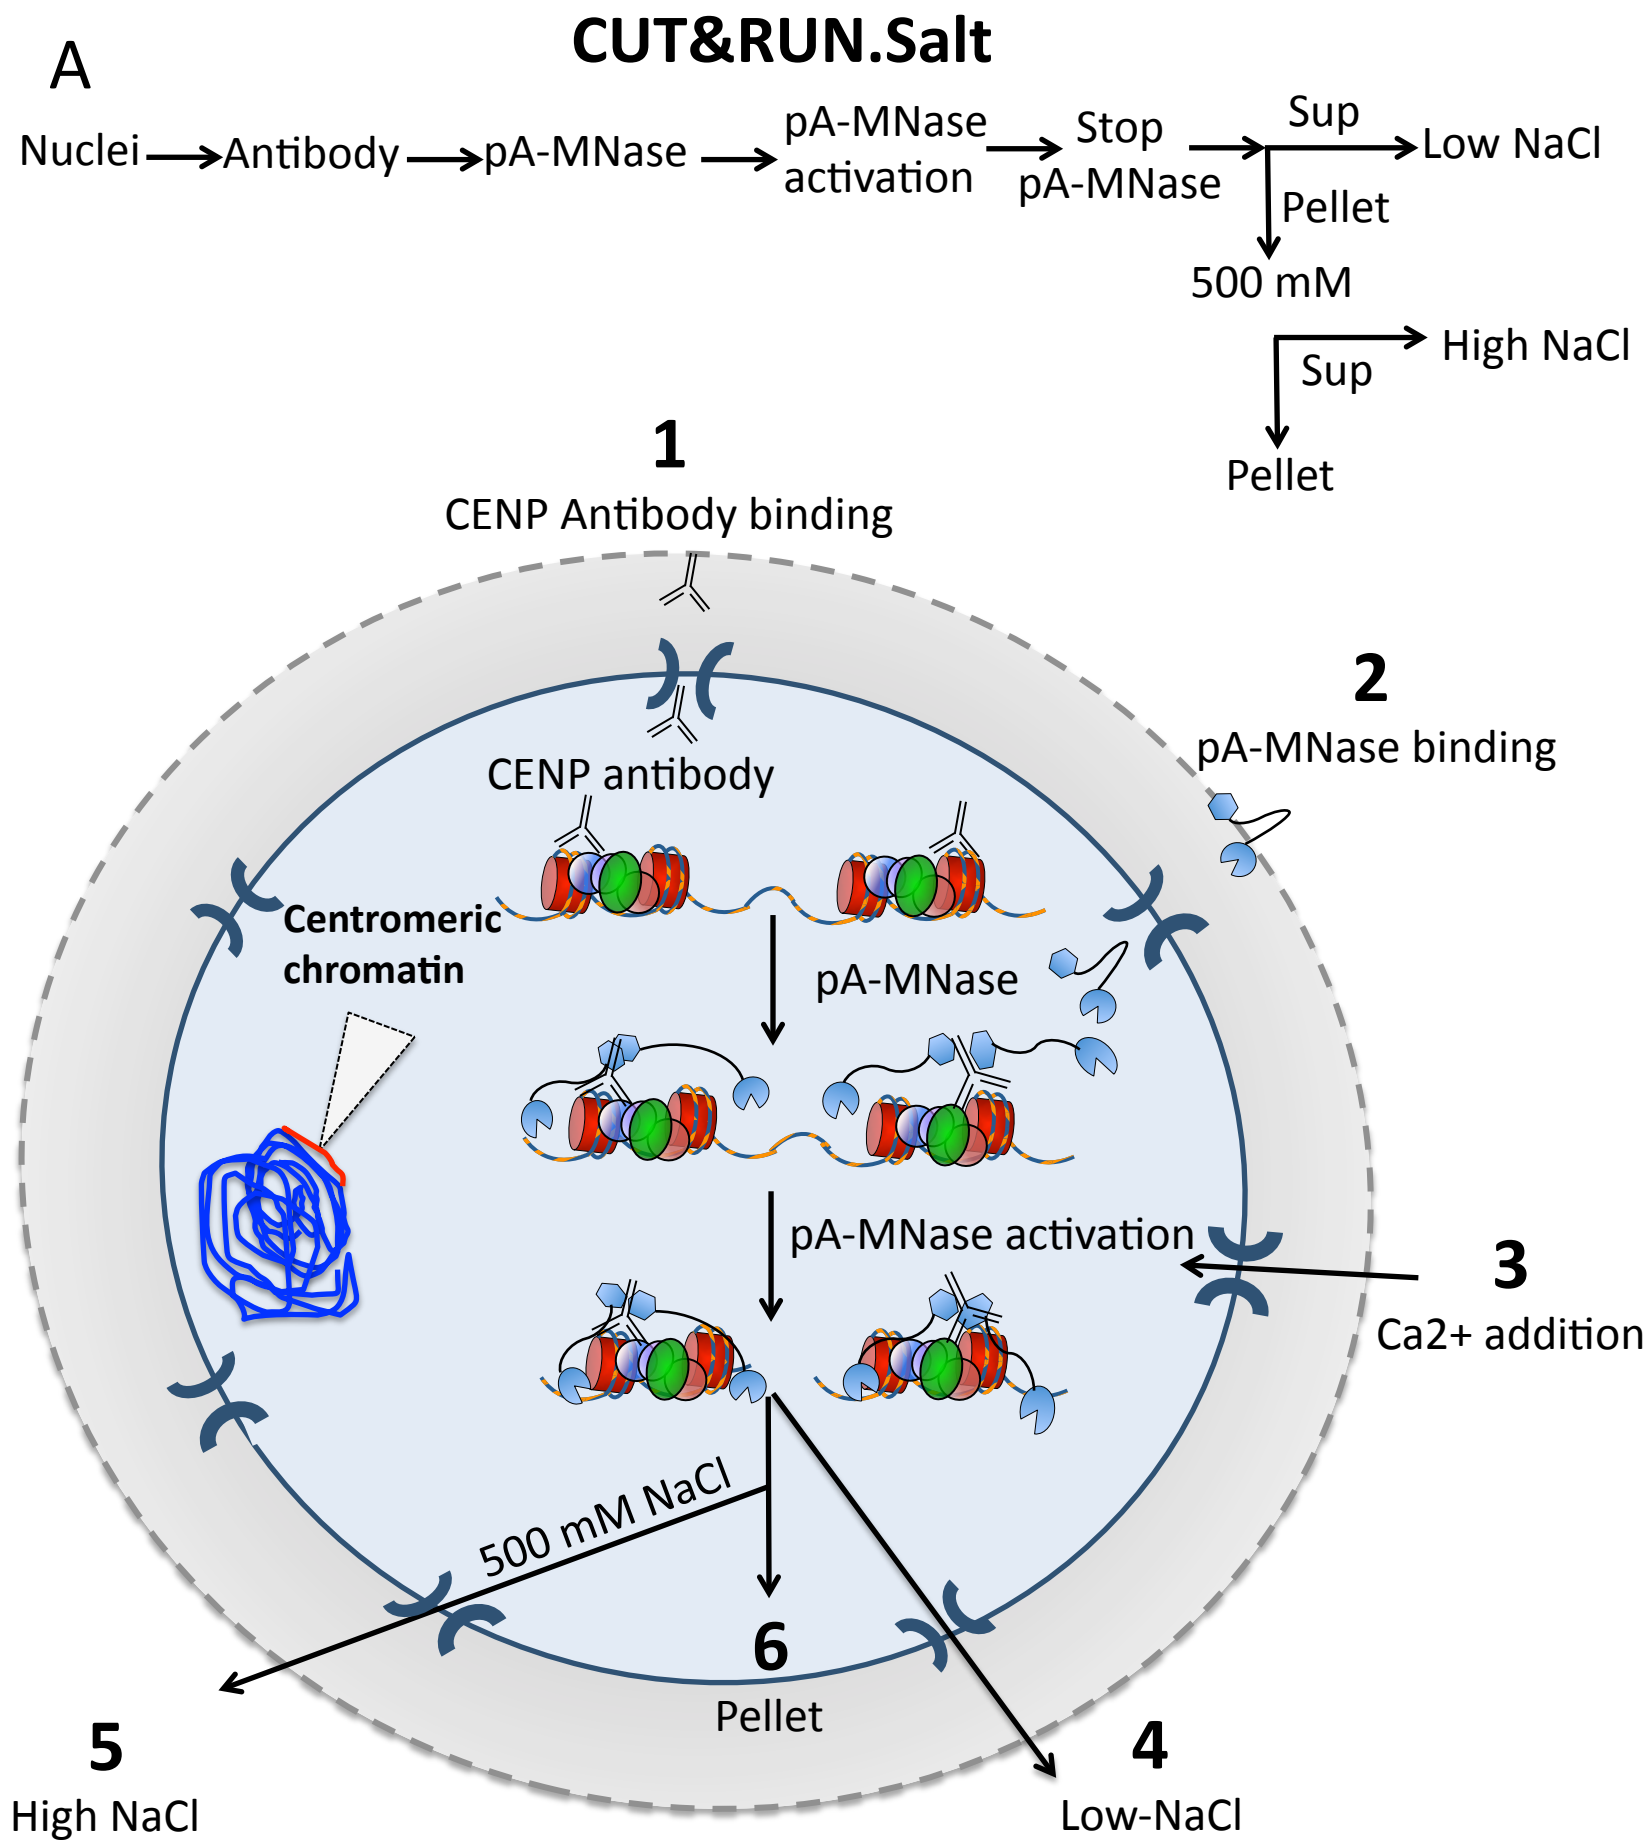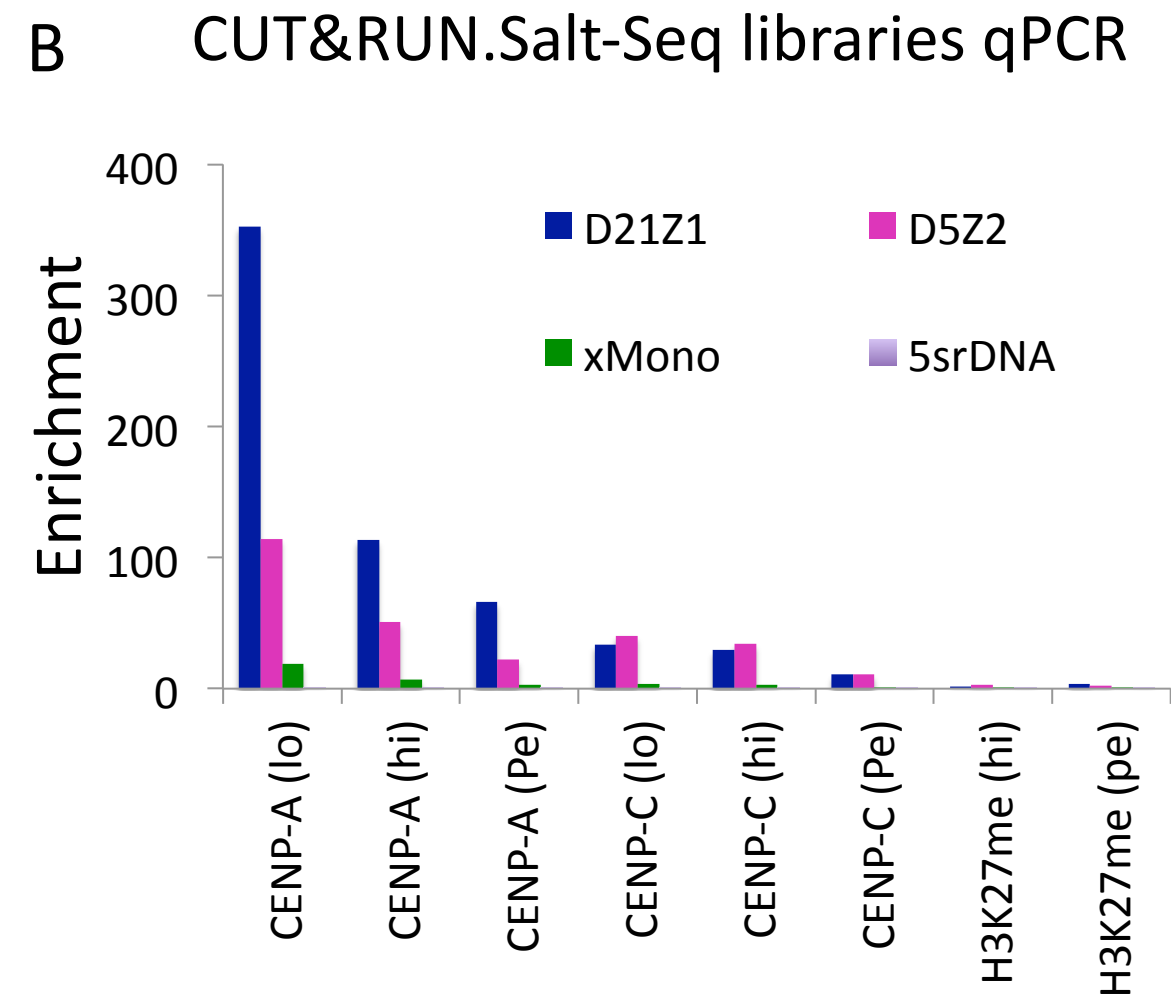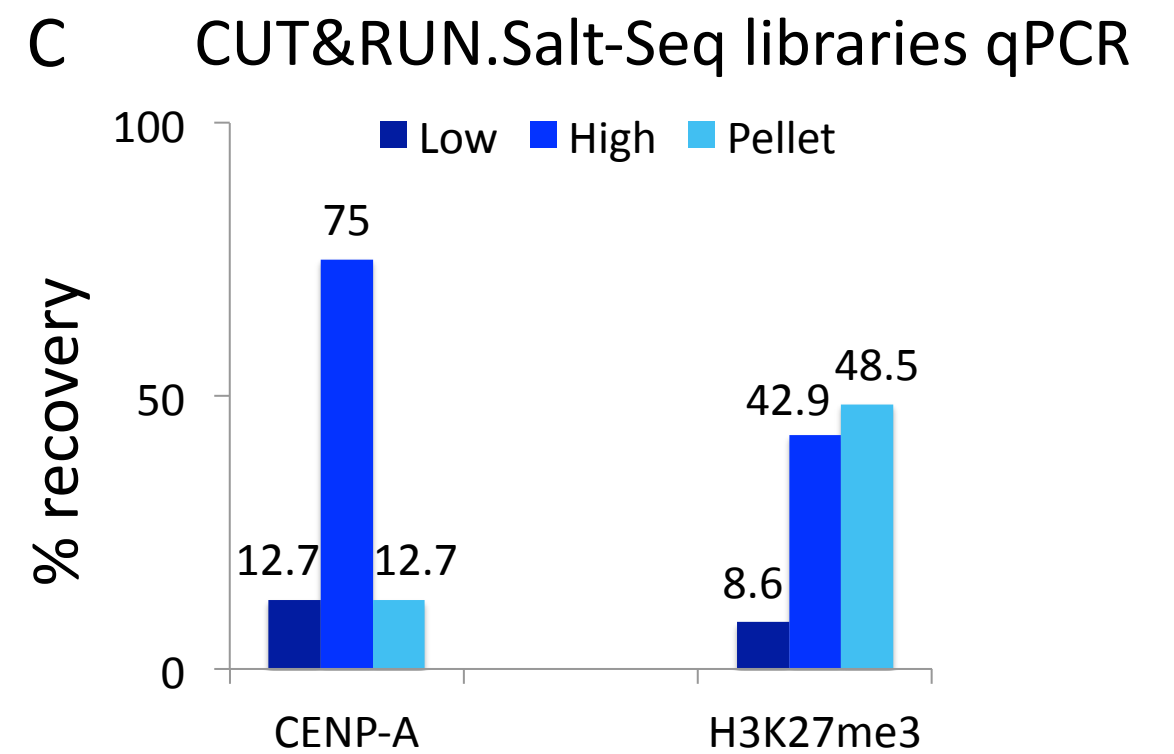

Supplement: supp_gad.307736.117_Supplemental_Fig1.pdf [file supp_gad.307736.117_Supplemental_Fig1.pdf]
