# Supplementary material for: Unexpected conformational variations of the human centromeric chromatin complex
Source: PubMed Central journal article supplement (PMC5828391; doi:10.1101/gad.307736.117), 2018-01-01

# Supplementary figure2

## CENP-B CUT&RUN.Salt

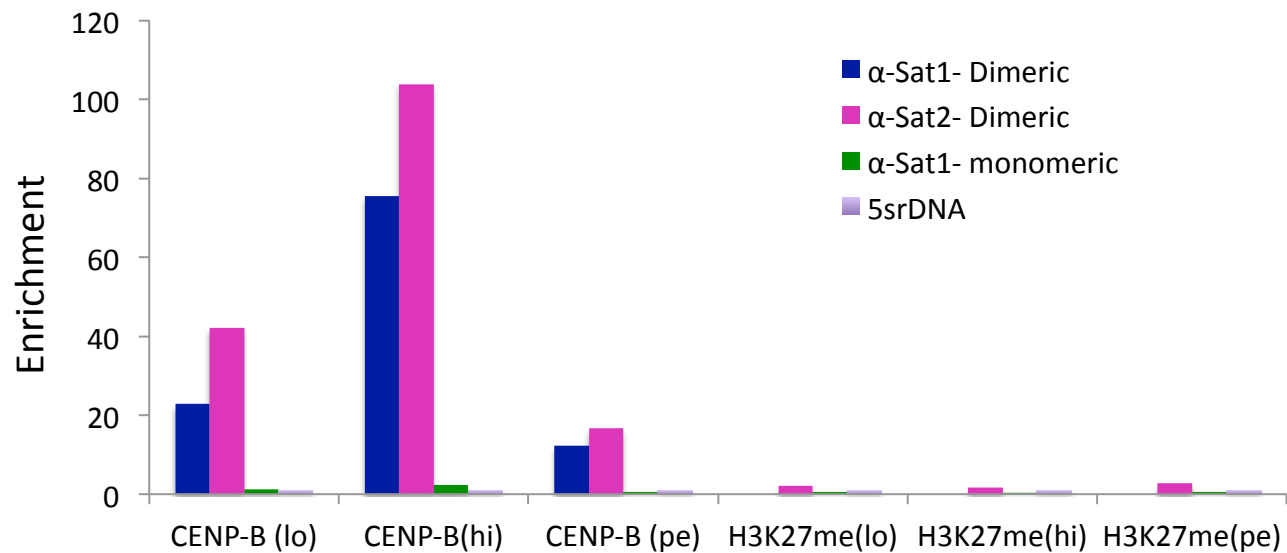

## CENP-B CUT&RUN.Salt

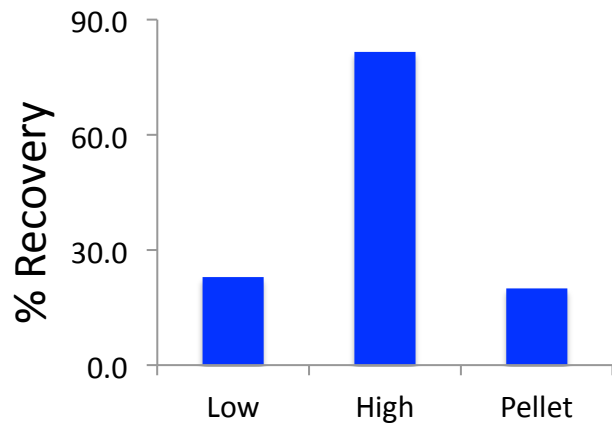

Supplement: supp_gad.307736.117_Supplemental_Fig2.pdf [file supp_gad.307736.117_Supplemental_Fig2.pdf]
