# Supplementary material for: Unexpected conformational variations of the human centromeric chromatin complex
Source: PubMed Central journal article supplement (PMC5828391; doi:10.1101/gad.307736.117), 2018-01-01
Supplement: supp_gad.307736.117_Supplemental_Table2.pdf [file supp_gad.307736.117_Supplemental_Table2.pdf]

Supplementary Table 1. Primers used for qPCR in this study.

| Primer                    | Sequence                 |
|---------------------------|--------------------------|
| Dimeric- $\alpha$ -Sat1F  | AGGGAATGTCTTCCCATAAAAAC  |
| Dimeric- $\alpha$ -Sat1R  | GTCTACCTTTTATTTGAATTCCCG |
| Dimeric- $\alpha$ -Sat2F  | TTTTTGTGCAATTGGCAAATGGAG |
| Dimeric- $\alpha$ -Sat2R  | AGACTGTTTCCTCACTGCTCT    |
| Monomeric- $\alpha$ -SatF | TTCAACTCACAGAGTTGTACC    |
| Monomeric- $\alpha$ -SatR | GCACTACAAATATCCACCTGC    |
| 5srDNA-F                  | CCGGACCCCAAAGGCGCACGCTGG |
| 5srDNA-R                  | TGGCTGGCGTCTGTGGCACCCGCT |
